1 **Experimental increases in glucocorticoids alter function of the HPA axis in wild red squirrels**  
2 **without negatively impacting survival and reproduction**

3

4 Freya van Kesteren<sup>1\*</sup>, Brendan Delehanty<sup>2</sup>, Sarah E. Westrick<sup>1</sup>, Rupert Palme<sup>3</sup>, Rudy Boonstra<sup>2</sup>, Jeffrey  
5 E. Lane<sup>4</sup>, Stan Boutin<sup>5</sup>, Andrew G. McAdam<sup>6</sup>, Ben Dantzer<sup>1,7</sup>

6 1. Department of Psychology, University of Michigan, MI 48109 Ann Arbor, Michigan, USA

7 2. Department of Biological Sciences, University of Toronto Scarborough, Toronto, Ontario, M1C 1A4  
8 Canada

9 3. Department of Biomedical Sciences, University of Veterinary Medicine, A-1210 Vienna, Austria

10 4. Department of Biology, University of Saskatchewan, Saskatoon, SK S7N 5E2, Canada

11 5. Department of Biological Sciences, University of Alberta, Edmonton, Alberta, Canada T6G 2E9

12 6. Department of Integrative Biology, University of Guelph, Guelph, Ontario, Canada N1G 2W1

13 7. Department of Ecology and Evolutionary Biology, University of Michigan, MI 48109, Ann Arbor,  
14 Michigan, USA

15

16 \*Corresponding author: [dantzer@umich.edu](mailto:dantzer@umich.edu)

17

18 **Running Page Head:** Effects of experimental increases of glucocorticoids in squirrels

19

20 **Keywords:** cortisol; glucocorticoids; hormone manipulations; hypothalamic–pituitary–adrenal (HPA)  
21 axis; North American red squirrels; stress

22 **Abstract**

23           Hormones such as glucocorticoids (colloquially referred to as “stress hormones”) have important  
24 effects on animal behavior and life history traits, yet most of this understanding has come through  
25 correlative studies. While experimental studies offer the ability to assign causality, there are important  
26 methodological concerns that are often not considered when manipulating hormones, including  
27 glucocorticoids, in wild animals. In this study, we examined how experimental elevations of cortisol  
28 concentrations in wild North American red squirrels (*Tamiasciurus hudsonicus*) affected their  
29 hypothalamic–pituitary–adrenal (HPA) axis reactivity, and life history traits including body mass, litter  
30 survival, and adult survival. The effects of exogenous cortisol on plasma cortisol concentrations  
31 depended on the time between treatment consumption and blood sampling. In the first nine hours after  
32 consumption of exogenous cortisol, individuals had significantly higher true baseline plasma cortisol  
33 concentrations, but adrenal gland function was impaired as indicated by their dampened response to  
34 capture and handling and to injections of adrenocorticotrophic hormone compared to controls.  
35 Approximately 24 hours after consumption of exogenous cortisol, individuals had much lower plasma  
36 cortisol concentrations than controls, but adrenal function was restored. Corticosteroid binding globulin  
37 (CBG) concentrations were also significantly reduced in squirrels treated with cortisol. Despite these  
38 profound shifts in the functionality of the HPA axis, squirrel body mass, offspring survival, and adult  
39 survival were unaffected by experimental increases in cortisol concentrations. Our results highlight that  
40 even short-term experimental increases in glucocorticoids can affect adrenal gland functioning and CBG  
41 concentrations but without other side-effects.

42

## 43 **Introduction**

44           Associations between glucocorticoids (GCs) and life history or behavioral traits are increasingly  
45 studied, due to their role as a mechanistic link between the genome and the environment, and to uncover  
46 general relationships between hormones and fitness (Breuner et al., 2008; Dantzer et al., 2016). GCs are  
47 released by the hypothalamic-pituitary-adrenal (HPA) axis in response to environmental challenges and  
48 have widespread effects on physiology and behavior (Sapolsky et al., 2000; Romero, 2004).  
49 Correlational studies have helped advance our understanding of the relationships between GCs and  
50 phenotypic traits in wild animals, but establishing the causality of such relationships requires  
51 experimental manipulation of GCs. In laboratory settings, hormone manipulations are logistically  
52 feasible (e.g. Karatsoreos et al., 2010; Lussier et al., 2009), but experimental studies conducted in wild  
53 populations are likely to provide better insights into the ecologically relevant effects of GCs on life  
54 history variation.

55           Hormone manipulations in wild animals are more challenging than in the laboratory, but several  
56 methods have been developed (see Sopinka et al., 2015). That said, exogenous GCs may have  
57 unintended physiological side effects, which may influence or skew interpretation of the results obtained  
58 from manipulative studies. One potential problem with hormone manipulations is related to the fact that  
59 the endocrine system is a homeostatic system that is controlled by negative feedback mechanisms and  
60 tends to compensate for disruption. Therefore, if animals are treated with a hormone, the endogenous  
61 production of the hormone may be reduced after a few days, and longer treatment duration may lead to  
62 the regression of the endocrine gland, and have important consequences for endocrine homeostasis  
63 (Fusani, 2008). Such effects are well documented in humans, as both cortisol and synthetic GCs (which  
64 may be more potent, see Meikle and Tyler, 1977), are used to treat a range of ailments (Arabi et al.,  
65 2010; Kirwan et al., 2007). For example, cortisol administration may lead to side-effects, including

66 suppression of the HPA axis and reduced adrenal function (Broide et al., 1995; Feiwel et al., 1969;  
67 Jacobs et al., 1983). Although such side-effects are usually temporary (Morris and Jorgensen, 1971;  
68 Streck and Lockwood, 1979), in extreme cases, patients may develop more severe and long term  
69 conditions such as Cushing's syndrome (see Axelrod, 1976) or secondary adrenal insufficiency that can  
70 lead to Addison's disease (Arlt and Allolio, 2003).

71         If GC manipulations affect the adrenal glands, endogenous production of GCs, and endocrine  
72 homeostasis, this may lead to unintended consequences in wild animals. This could jeopardize the value  
73 of performing such studies, as they could adversely influence survival and reproduction. Indeed, some  
74 studies indicate that elevations in GCs reduce estimates of fitness (Bonier et al., 2009; Breuner et al.,  
75 2008; Wingfield et al., 1998), but it is unclear if this is due to an unintended complication from the  
76 manipulation rather than a natural consequence of increased GCs. Although these issues were  
77 highlighted 10-15 years ago (Romero, 2004; Fusani, 2008; see also Sopinka et al. 2015; Crossin et al.,  
78 2016), detailed studies about the potential complications of manipulating hormones in wild animals have  
79 not been widely performed except in birds. Torres-Medina et al. (2018) reviewed the consequences of  
80 experimentally elevated GCs on baseline and stress-induced corticosterone levels from previous studies  
81 on multiple bird species that were published 2005-2015. Many but not all of these studies were  
82 conducted in free-living birds. They showed that most studies that experimentally elevated GCs (using  
83 silastic implants, time release pellets, or osmotic pumps) examined how corticosterone treatment  
84 affected baseline corticosterone levels but very few investigated treatment effects on stress-induced  
85 corticosterone levels. Their results documented that birds treated with exogenous GCs exhibited lower  
86 stress-induced corticosterone levels, suggesting that experimental elevation of GCs can suppress the  
87 activity of the HPA axis in wild birds just as in studies in humans or laboratory rodents.

88 Unlike birds, studies that experimentally elevated GCs in free-living mammals are extremely  
89 rare and we are not aware of any study that has investigated both how treatment with GCs affects the  
90 HPA axis in wild mammals or how changes in the HPA axis induced by treatment with exogenous GCs  
91 affects fitness proxies. We examined how exogenous cortisol affected the HPA axis and life history  
92 traits of North American red squirrels (*Tamiasciurus hudsonicus*) by treating squirrels with exogenous  
93 cortisol or control vehicle. We expected that exogenous cortisol would increase fecal glucocorticoid  
94 metabolite (FGM) and plasma cortisol concentrations, but that, as may be the case in humans receiving  
95 GC therapy or birds with corticosterone implants, HPA axis responsiveness would decrease. We  
96 examined how administration of exogenous cortisol affected the responsiveness of the HPA axis by  
97 measuring the change in plasma cortisol concentrations following 1) capture and handling and 2)  
98 pharmaceutical suppression with dexamethasone (Dex) and pharmaceutical stimulation with  
99 adrenocorticotropin hormone (ACTH; hereafter “Dex/ACTH challenges”). Because we expected that  
100 administration of cortisol would suppress HPA axis responsiveness, we also examined how quickly the  
101 HPA axis recovered after administration of exogenous cortisol by measuring HPA axis responsiveness  
102 (using the Dex/ACTH challenges) in squirrels that received exogenous cortisol on the same day of  
103 sampling or the day after their last treatment. We expected that exogenous cortisol might lead to  
104 increased body mass in squirrels (Axelrod, 1976), but did not expect our treatment dosages to be  
105 sufficiently high to cause anorexia through sustained adrenal impairment (Arlt and Allolio, 2003). As we  
106 aimed to keep GCs within a physiologically-relevant (‘normal’) range for this species, we did not expect  
107 to see negative effects of our treatments on body mass or adult or litter survival.

108

109

## 110 **Methods**

### 111 *Study population*

112 All of our research was approved by the *Animal Care and Use Committee* at the University of  
113 Michigan (PRO00005866). We studied a natural population of red squirrels in the Yukon, Canada  
114 (61°N, 138°W) that has been monitored since 1987 (Boutin et al., 2006; McAdam et al., 2007). All  
115 squirrels in this population are individually identified by a unique ear tag in each ear, as well as a unique  
116 color combination of colored wires attached to each ear tag which allow researchers to identify  
117 individuals from a distance. Squirrels were live-trapped (Tomahawk Live Trap Co., WI, USA), during  
118 which they were weighed using a Pesola spring balance, and fecal samples were collected from  
119 underneath traps, placed on ice, and stored at -20 °C upon return to the field station (Dantzer et al.,  
120 2010). Female and male reproductive condition was assessed through palpation or by expressing milk  
121 from the teats in females (see McAdam et al., 2007).

### 122 *Experimental manipulations of GCs*

123 In 2015 and 2016, squirrels were randomly allocated to either control (8 g all natural peanut  
124 butter, 2 g wheat germ, no cortisol) or cortisol treatments (8 g peanut butter, 2 g wheat germ with 6, 8, or  
125 12 mg of cortisol [H4001, Sigma Aldrich, USA]). Dosages of 0, 6, 8, and 12 mg cortisol were selected  
126 following previous studies in red squirrels (Dantzer et al., 2013) and laboratory rodents (Casolinia et al.,  
127 1997; Catalani et al., 2002; Mateo, 2008) that used similar dosages to induce a moderate increase in  
128 GCs. Treatments were provided directly to squirrels by putting the treatment in a bucket that was hung  
129 from trees on their territories (Dantzer et al., 2013). To ensure that target squirrels (identifiable through  
130 ear tags/radio-collars) were consuming the treatments, camera traps (Reconyx PC900 HyperFire  
131 Professional Covert IR) were placed by the buckets of 31 squirrels for five continuous days. Out of 155

132 d of camera trapping, conspecific pilferage was only observed ten times, and there was one case of  
133 heterospecific pilferage by a grey jay (*Perisoreus canadensis*). Consumption of each treatment was  
134 estimated daily by checking buckets for any leftovers and estimating these as a percentage. Squirrels  
135 consumed on average 91.9% of their total peanut butter treatments (median = 100%, SD = 12.13%,  
136 range = 43-100%).

### 137 *Effects of exogenous cortisol on fecal glucocorticoid metabolites (FGM)*

138 To evaluate the effects of cortisol treatments on FGM, fecal samples were collected in 2015 and  
139 2016 from male and female squirrels fed with 0, 6, 8, and 12 mg cortisol/day (Table 1). Glucocorticoid  
140 metabolites from fecal samples were extracted and assayed as previously validated and described  
141 (Dantzer et al., 2011, 2010) using a 5 $\alpha$ -pregnane-3 $\beta$ ,11 $\beta$ ,21-triol-20-one enzyme immunoassay (Touma  
142 et al., 2003). Intra- and inter-assay CVs for pools diluted 1:250 (n = 13 plates) were 7.4% and 15.4%.  
143 For pools diluted 1:500 (n = 13 plates) this was 7.5% and 17.9%. Pools diluted 1:100 (n = 9 plates) had  
144 intra and inter-assay CVs of 10.0% and 17.9%, and for pools diluted at 1:700 (n = 9 plates) this was  
145 6.4% and 18.9%. Samples from control (n = 135) or cortisol (n = 237) treated squirrels included those  
146 collected before (range: 0-21 days before treatment started, mean  $\pm$  SE: 7  $\pm$  0.7 days), during, and after  
147 treatment (range: 1-21 days after treatment, mean  $\pm$  SE: 9.4  $\pm$  0.8 days, Table 1).

### 148 *Effects of exogenous cortisol on plasma cortisol concentrations and corticosteroid binding capacity*

149 Non-breeding male squirrels were fed cortisol (8 mg/day) or control treatments for one (n = 40  
150 squirrels) or two weeks (n = 26). The time that squirrels consumed their treatments was estimated by  
151 checking buckets at regular intervals between 25 minutes and a few hours (shown as hours:min, mean =  
152 1:53 hrs, SD = 1:12 hrs). Squirrels were either blood sampled the same day they consumed their last  
153 treatment (n = 36 squirrels, mean = 3:30 hrs after treatment consumption, range = 0:57-8:55 hrs) or the

154 day after they consumed their last treatment (n = 30, mean = 22:46 hrs after treatment consumption,  
155 range = 14:57-30:55 hrs). Note that for 19 next day bleed squirrels, the time of treatment consumption  
156 was not recorded. Blood samples obtained within 3 min of squirrels entering a trap (n = 54 samples) are  
157 referred to as *true baseline* samples (Romero et al. 2005). If the first blood sample was obtained >3 min  
158 after squirrels went into traps (n = 12), this is referred to as *stress-induced* samples. Stress-induced  
159 samples are considered to reflect the effects of capture and handling on plasma cortisol concentrations or  
160 were taken to see if dexamethasone administration (see below) would reduce plasma cortisol  
161 concentrations. Although the time of day we obtained blood samples varied, there was no daytime  
162 sampling bias between cortisol treated (between 9:41 and 18:07, mean = 13:23) and control squirrels  
163 (between 9:33 and 17:31, mean = 13:50, t-test,  $t_{42.15} = 1.14$ ,  $p = 0.26$ ). We also conducted a general linear  
164 model containing time of day of sampling ( $b = -0.02$ ,  $SE = 0.18$ ,  $t_{14} = -0.12$ ,  $P = 0.91$ ) and a quadratic  
165 term for time of day ( $b = -0.41$ ,  $SE = 0.24$ ,  $t_{14} = -1.68$ ,  $P = 0.11$ ) and found no significant effect of  
166 sampling time on plasma cortisol.

167 Blood samples were obtained from the nailbed and collected into heparinized capillary tubes, and  
168 plasma was separated via centrifugation and frozen at  $-20^{\circ}\text{C}$ . Total plasma cortisol concentrations were  
169 assayed using an ImmunoChem coated tube cortisol radioimmunoassay (MP Biomedicals, New York,  
170 USA) following the manufacturer's instructions, with the exception that, due to small sample volumes,  
171 plasma and tracer volumes of 12.5  $\mu\text{L}$  and 500  $\mu\text{L}$  were used. This assay has already been validated and  
172 used to measure plasma cortisol in other rodent species (Karatsoreos et al. 2010; Brooks and Mateo,  
173 2013). We validated this kit by first showing linearity and then demonstrating that the assay reliably  
174 responds to changes in HPA axis activity through the decreases in plasma cortisol we observed in  
175 response to Dex and the increases in plasma cortisol in response to ACTH (Fig. 3). Linearity was tested  
176 by pooling several samples and serially diluting these from 1 (neat) to 1:64. Results were plotted,



177 visually inspected, and evaluated with linear regression ( $R^2$  adj = 0.991,  $p < 0.001$ ). According to the  
178 manufacturer, the assay detection limit is 1.7 ng/ml, and samples that read below this value ( $n = 8$ ) were  
179 set at 1.7 ng/ml. Most samples were run in duplicate, but because of small plasma volumes only one  
180 estimate was obtained for 33.9% of samples. Average standard and sample intra-assay CVs were 7.9%  
181 ( $n = 4$  assays). Inter-assay CVs for the five standards provided (10, 30, 100, 300 and 1000 ng/ml  
182 cortisol) were 11.1%, 15.4%, 8.8%, 4.0% and 7.7%.

183 Corticosteroid binding capacity (CBG) was measured in plasma stripped of endogenous steroids  
184 using dextran-coated charcoal (DCC) and diluted to a final dilution of 1/50 in phosphate buffered saline  
185 with 0.1% gelatin (PBS). Three tubes (final volume of 150  $\mu$ L) were prepared for each sample: two  
186 containing 160 nM cortisol (10% 1,2,6,7- $^3$ H-cortisol, Perkin Elmer, Waltham, MA, and 90% non-  
187 labeled cortisol, C-106, Sigma-Aldrich) to measure total binding, and one containing an additional 4  $\mu$ M  
188 non-labeled cortisol to measure nonspecific binding (primarily by albumin). After incubating tubes  
189 overnight, 300  $\mu$ L of ice-cold DCC was added and left for 15 minutes to strip free cortisol from the  
190 plasma mixture. The tubes were then centrifuged at 2000 x  $g$  at 4  $^{\circ}$ C for 12 minutes. The supernatant  
191 (containing bound cortisol) was decanted into scintillation vials, to which 4 mL of scintillation fluid  
192 (Emulsifier-Safe cocktail, Cat. No. 6013389, Perkin Elmer, Groningen, Netherlands) was added. Vials  
193 were counted in a scintillation counter. Specific binding by CBG was calculated by subtracting  
194 nonspecific binding counts from total binding counts. Specific binding scintillation counts were  
195 converted to nM binding by measuring the total counts in the 150  $\mu$ L of the 160 nM solution and  
196 adjusting for the plasma dilution. Some CBG-bound hormone is lost to the DCC during the 15 minute  
197 DCC exposure. Using pooled plasma exposed to DCC for 5-20 minutes, we calculated the rate of loss of  
198 CBG-bound cortisol (data not shown). From this, we calculated that the 15 minute DCC exposure  
199 resulted in the loss of 28.5% of CBG-bound hormone, and all our specific binding measurements were

200 corrected accordingly. To calculate the percent free cortisol, we estimated free cortisol concentrations  
201 (i.e. not bound by CBG) using the total cortisol concentration, the equilibrium dissociation constant for  
202 red squirrels of 61.1 nM (Delehanty et al., 2015), and the equation in Barsano and Baumann (1989). As  
203 plasma volumes were limited, only 58 samples could be assayed for both CBG/percent free cortisol and  
204 total cortisol (see below for details).

### 205 *Effects of exogenous cortisol on HPA axis reactivity*

206 To determine how our cortisol treatments affected the responsiveness of the HPA axis, we used  
207 two different methods. First, we assessed the response to capture and handling (“handling stress”) in  
208 cortisol-treated and control squirrels by acquiring a series of blood samples starting immediately after  
209 they entered the live-trap. Squirrels were bled at intervals of 0-3, 3-6, 6-12 and 18-22 min after trap  
210 doors closed either the same day as confirming they ate their last treatment (mean time elapsed = 3:36  
211 hrs, range = 0:57-8:55 hrs, cortisol n = 10, control n = 13) or the next day (mean time elapsed = 22:46,  
212 hrs range = 14:57-30:55 hrs, cortisol n = 5, control n = 6).

213 Second, in a separate set of squirrels, we assessed how cortisol-treated and control squirrels (n =  
214 32) responded to intra-muscular injections of dexamethasone (Dex, a glucocorticoid receptor antagonist)  
215 and adrenocorticotrophic hormone (i.e., Dex/ACTH challenges). We used previously described protocols  
216 (Boonstra and McColl, 2000), with modified concentrations of Dex (3.2 mg/kg) and ACTH (4 IU/kg).  
217 Briefly, squirrels were captured and a true baseline blood sample (0-3 min after entering trap) was  
218 obtained followed by the acquisition of a second blood sample (stress-induced sample) an average of  
219 12:37 min (min:sec, n = 13, range = 5:00-28:00 min) after the squirrel entered the trap (time of the  
220 stress-induced sample was not recorded for 13 different squirrels as traps were checked ~60 min after  
221 they were set). Squirrels were then injected with Dex and a third blood sample was acquired 60 min

222 after injection. Following the acquisition of the third blood sample, squirrels were injected with ACTH  
223 and then blood sampled 30 and 60 min after ACTH injection.

#### 224 *Effects of exogenous cortisol on adult squirrel body mass*

225 We assessed how treatment with exogenous cortisol affected body mass of non-breeding females  
226 (n = 21 females, 64 body mass measures before treatment and 85 records during treatment) and non-  
227 breeding males (n = 47 males, 37 body mass measures before treatment and 28 records during treatment)  
228 by live-trapping them approximately once per week and weighing them to the nearest 5g with a spring  
229 scale (McAdam et al., 2007). We compared non-breeding squirrel body mass in cortisol treated and  
230 control squirrels sampled in 2015 and 2016 before and during the treatments.

#### 231 *Effects of exogenous cortisol on litter survival*

232 As a part of our long-term data collection, we track the reproduction of females during  
233 pregnancy and lactation by capturing them, palpating their abdomens to identify pregnancy stage, and  
234 expressing milk from their teats to identify if they are lactating (McAdam et al., 2007). We also retrieve  
235 pups from their natal nest soon after parturition (“first nest entry”) and approximately 25 d after  
236 parturition (“second nest entry”) to collect a range of data described elsewhere (McAdam et al., 2007).  
237 We used these data to identify how treatment with exogenous cortisol affected litter survival in females  
238 treated only during pregnancy (n = 71) and in a separate group of females treated only during lactation  
239 (n=17) compared to controls. In these comparisons, we also included data on litter fate collected in 2012  
240 from squirrels fed the same dosages (0, 6, 12 mg cortisol/day) for similar periods of time (see Dantzer et  
241 al., 2013). When females gave birth, their nests were located an average of 1.6 d after parturition (SD =  
242 1.6 d, range = 0-6 days) and then again 25.5 d after parturition (SD = 1.5 d, range = 21-29 d).

243 We examined how our treatments affected whether females treated during pregnancy (control n  
244 = 24, 6 mg cortisol/day n = 9, 8 mg cortisol/day n = 16, 12 mg cortisol/day n = 22) or lactation (control  
245 n = 8, 12 mg cortisol/day n = 9) lost their litters before the first nest entry (via abdominal palpation) or  
246 between the first and second nest entry (indicated by cessation of lactation). Females treated during  
247 pregnancy were treated from the estimated last third of pregnancy (based on abdominal palpation), until  
248 five days post parturition (treatment duration range = 8 – 25 days, mean = 18, SD = 4). Females treated  
249 during lactation were treated for 10 continuous days, from days 5 to 15 post parturition (mean = 9.9 d,  
250 SD = 0.6, range = 8 -11 days).

### 251 *Effects of exogenous cortisol on adult squirrel survival*

252 The effects of treatment with exogenous cortisol on survival of adult squirrels was monitored  
253 through regular live trapping and behavioral observations (McAdam et al., 2007). Survival data were  
254 only available from squirrels studied in 2015 (n = 50, including 41 females and nine males). These  
255 squirrels were fed either control treatments (n = 25, 10-26 days, mean = 19, SD = 7) or 12 mg  
256 cortisol/day (n = 25, 8-35 days, mean = 20, SD = 7). Although we did not know the ages of all squirrels,  
257 there was no age bias between squirrels fed control (eight known ages, mean = 4.05, SD= 1.05 years)  
258 and those fed cortisol (nine known ages, mean = 3.97, SD = 0.87 years,  $t_{13.8} = 0.18$ ,  $p = 0.86$ ). We  
259 estimated survival until exactly 1 year after the treatments were stopped.

### 260 *Statistical analyses*

261 Analyses were conducted using R statistical software (v 3.3.3, R Core Team, 2017). When there  
262 were multiple measures for individual squirrels, linear mixed-effects models (LMMs) were conducted  
263 using packages ‘lme4’ (v 1.1.10, Bates et al., 2015) and all such models contained ‘squirrel ID’ as a  
264 random intercept term. If there were no repeated measures, general linear models (GLM) were used. To

265 make comparisons between groups, we used the ‘glht’ function in R package ‘multcomp’ (Hothorn et  
266 al., 2017). Model residuals were plotted to check for conformity with homogeneity of variance and  
267 normality (Zuur et al., 2010). Where necessary, data were ln transformed. Regression lines were  
268 visualized using R package ‘visreg’ (v 2.2.2, Breheny and Burchett, 2016).

269 We tested effects of treatments on FGM concentrations using LMMs, analyzing female and male  
270 data separately due to differences in reproductive states. Models for females included dose (0, 6, 8, 12  
271 mg of cortisol/day), reproductive state (non-breeding, pregnant, lactating), Julian date, and whether the  
272 squirrel was treated on the sampling day (yes/no) as fixed effects, with an interaction term for dose and  
273 treatment (yes/no). Models for males included the same variables (but only doses of 0 and 8 mg) except  
274 reproductive state (all were non-breeding).

275 To assess how our treatments affected the responsiveness of the HPA axis, we used two separate  
276 LMMs to assess if cortisol treated and control squirrels differed in their plasma cortisol concentrations  
277 following 1) our capture and handling stress experiments where we obtained a series of blood samples 2  
278 to 28 min after the trap doors closed and 2) our Dex/ACTH challenges. For the LMM to assess the  
279 effects of capture and handling on plasma cortisol concentrations, the model included a fixed-effect for  
280 treatment (control or cortisol) and the time taken to acquire the blood sample expressed in minutes since  
281 the squirrel was trapped (standardized following Schielzeth, 2010). For the LMM to assess plasma  
282 cortisol concentrations following the Dex/ACTH challenges, the model included the fixed effect (control  
283 or cortisol) and a categorical variable for when the blood sample was obtained (‘true baseline’, ‘stress-  
284 induced, ‘60 minutes after Dex injection’ [hereafter; DEX], ‘30 minutes after ACTH injection’  
285 [hereafter; ACTH30], and ‘60 minutes after ACTH injection’ [hereafter; ACTH60]). Two plasma  
286 samples with very low binding (<10%) were excluded from the analysis. Some models included  
287 squirrels treated for either 1 or 2 weeks, and some included squirrels that were treated in both spring and

288 autumn (n = 18 squirrels, with treatments switched between periods, with the exception of two squirrels  
289 fed GCs twice and one squirrel fed control treatments twice). Where this was the case, treatment  
290 duration (1/2 weeks) and whether or not squirrels had been treated before (yes/no) were included in our  
291 initial models. Because these two variables (treated for one/two weeks, and whether or not squirrels had  
292 been treated previously) were not significant in any of the models, we do not discuss them below.

293 To assess effects of treatments on CBG concentrations and percent free cortisol, we subset  
294 samples collected at different intervals after squirrels entered the traps (effects of handling stress  
295 samples) and those from Dex/ACTH challenges. For our handling stress samples, data from samples  
296 collected on the same day (n = 12) and the day after (n = 3) the last treatment was consumed were  
297 pooled. This model included an interaction between the sampling day (same/next) and treatment (control  
298 or 8 mg cortisol/day). Due to limited data (only 58 samples were analyzed for CBG, across all  
299 categories), only the effects of treatment (control or 8 mg cortisol/day) on CBG and percent free cortisol  
300 were tested for squirrels Dex/ACTH challenged on the same day as consuming their last treatments (n =  
301 16 squirrels). Models for squirrels ACTH challenged the day after consuming their last treatments (n =  
302 27 squirrels) included interactions between sample time (stress-induced, Dex, ACTH30, ACTH60) and  
303 treatment (control or 8 mg cortisol/day).

304 To estimate the total plasma cortisol in a 24 h period, true baseline cortisol was plotted against  
305 the time since treatment was consumed. Regression line equations were used to calculate the area under  
306 these lines for both control and cortisol treated squirrels, using the ‘trapzfun’ command in package  
307 ‘pracma’ (Borchers, 2018), and areas under the curve were compared with  $\chi^2$  tests.

308 Data on body mass were subset into those collected in spring (non-breeding females fed 0 or 12  
309 mg cortisol/day) and autumn (non-breeding males fed 0 or 8 mg cortisol/day). Body masses were  
310 compared using LMMs including a two-way interaction between treatment, and time (before/during

311 treatment). To assess differences between litter survival (lost/not lost), and adult survival (yes/no) GLMs  
312 were applied using binomial errors. Models included a binary fixed effect for treatment (12 mg  
313 cortisol/day or control) and sex (only for adult survival). Because the duration of the treatments varied  
314 among different squirrels, we also included total days of treatment and an interaction between treatment  
315 and treatment duration in all these models to assess how our treatments affected body mass and adult or  
316 litter survival. Dispersion parameters (using R package *blemco*, Korner-Nievergelt et al., 2015) between  
317 0.75 and 1.4 were taken to accept overdispersion was not problematic.

318

319

## 320 **Results**

### 321 *Effects of treatments on fecal glucocorticoid metabolite concentrations*

322 Overall, squirrels fed cortisol treatments (6, 8, 12 mg/day) had significantly higher FGM  
323 concentrations than when they were not being fed, but the magnitude of increase depended on the  
324 dosage ( $F_{3,263.8} = 11.5$ ,  $p < 0.001$ , Fig. 1). Both female and male control squirrels fed plain peanut butter  
325 had similar FGM concentrations when they were being fed their treatments compared to when they were  
326 not being fed their treatments (females:  $b = -0.03$ ,  $SE = 0.15$ ,  $z = 0.22$ ,  $p = 1.0$ ; males:  $b = 0.14$ ,  $SE =$   
327  $0.36$ ,  $z = 0.41$ ,  $p = 0.96$ ). FGM concentrations in both females and males fed 6, 8, or 12 mg cortisol/day  
328 were significantly higher compared when they were being fed compared to when they were not being  
329 fed (6 mg:  $b = 0.78$ ,  $SE = 0.28$ ,  $z = 2.8$ ,  $p = 0.032$ ; 8 mg: females:  $b = 0.79$ ,  $SE = 0.21$ ,  $z = 3.9$ ,  $p <$   
330  $0.001$ ; males:  $b = 1.37$ ,  $SE = 0.49$ ,  $z = 2.82$ ,  $p = 0.013$ ; 12 mg:  $b = 1.39$ ,  $SE = 0.17$ ,  $z = 8.0$ ,  $p < 0.001$ ).  
331 Concentrations of FGM during treatment in female squirrels treated with 12 mg vs 8 mg ( $b = 0.39$ ,  $SE =$   
332  $0.28$ ,  $z = 1.4$ ,  $p = 0.63$ ), 6 mg vs 8 mg ( $b = 0.36$ ,  $SE = 0.36$ ,  $z = 1.0$ ,  $p = 0.88$ ), and 6 mg vs 12 mg  
333 cortisol/day ( $b = 0.74$ ,  $SE = 0.35$ ,  $z = 2.1$ ,  $p = 0.18$ ) were not significantly different. Julian date did not

334 affect FGM concentrations in females ( $F_{1,284.9} = 3.44$ ,  $p = 0.06$ ) or males ( $F_{1,15.2} = 0.73$ ,  $p = 0.41$ ).  
335 Reproductive condition did not affect FGM in this dataset, possibly because of limited sample numbers  
336 on some reproductive states (see Table 1,  $F_{2,105.0} = 1.37$ ,  $p = 0.26$ ).

337 *Effects of treatments on total plasma cortisol concentrations over 24 hr period*

338 We plotted true baseline plasma cortisol concentrations against the time since treatment was  
339 consumed to estimate the area under these lines for both control and cortisol treated squirrels. The area  
340 under these lines was used to estimate the total plasma cortisol concentrations over a 24 hr period.  
341 Overall, we estimated that cortisol treated squirrels experienced significantly higher plasma cortisol  
342 (total area = 7907.4 units) than controls (total area = 4110.8 units) over a 24 h period ( $\chi^2 = 614.4$ ,  $DF =$   
343  $1$ ,  $p < 0.001$ , Fig. 2).

344 *Responsiveness of HPA axis to capture and handling in squirrels sampled same day or day after last*  
345 *treatment*

346 The effects of capture and handling on plasma cortisol concentrations were significantly  
347 different between control and cortisol treated squirrels, in addition to whether the squirrels were sampled  
348 on the same day or day after their last treatment. In squirrels sampled the same day as receiving their last  
349 treatment, plasma cortisol concentrations were generally higher in cortisol treated squirrels compared to  
350 controls, but their responsiveness to capture and handling differed (Fig. 3A). In control squirrels  
351 sampled the same day as receiving their last treatment, plasma cortisol concentrations significantly  
352 increased as handling time increased ( $b = 0.31$ ,  $SE = 0.11$ ,  $t = 2.8$ ,  $DF = 61.4$ ,  $p = 0.007$ , Fig. 3A)  
353 whereas they declined as handling time increased in cortisol treated squirrels ( $b = -0.56$ ,  $SE = 0.17$ ,  $t = -$   
354  $3.3$ ,  $DF = 61.4$   $p = 0.002$ , Fig. 3A).

355 In squirrels sampled the day after receiving their last treatment, plasma cortisol concentrations  
356 were generally lower in cortisol treated squirrels than in control squirrels ( $b = -1.8$ ,  $SE = 0.81$ ,  $t = -2.2$ ,



357 DF = 8.4,  $p = 0.057$ , Fig. 3B), though this difference was not significant. Handling time increased  
358 plasma cortisol concentrations in both control and cortisol treated squirrels ( $b = 0.42$ , SE = 0.20,  $t = 2.1$ ,  
359 DF = 19.2,  $p = 0.048$ ) and this was not affected by treatment ( $b = 0.40$ , SE = 0.1.4, DF= 18.7,  $p = 0.16$ ,  
360 Fig. 3B).

361 *Responsiveness of HPA axis to Dex/ACTH challenges in squirrels sampled on the same day as*  
362 *consuming last treatment*

363 In squirrels sampled on the same day as consuming their last treatment, HPA axis responsiveness  
364 to our Dex/ACTH challenges differed between control and cortisol treated squirrels ( $F_{9,35.5} = 6.4$ ,  $p <$   
365  $0.001$ , Fig. 3A). Squirrels treated with cortisol (8 mg/day) had significantly higher true baseline cortisol  
366 concentrations ( $611.4 \pm 104.4$  ng/ml) than control squirrels ( $214.5 \pm 41.3$  ng/ml,  $b = 394.7$ , SE = 88.7,  $z =$   
367  $4.4$ ,  $p < 0.001$ , Fig. 3A) but cortisol treated and control squirrels had similar stress-induced plasma  
368 cortisol concentrations ( $b = 15.9$ , SE = 114.5,  $z = 0.14$ ,  $p = 1$ , Fig. 3A). Both cortisol treated ( $205.8 \pm 50.2$   
369 ng/ml) and control ( $292.2 \pm 44.5$  ng/ml) squirrels responded to Dex, as indicated by the reductions in their  
370 plasma cortisol concentrations 60 min after the Dex injection compared to stress-induced plasma cortisol  
371 concentrations, although these reductions in were not significant (control:  $b = -33.9$ , SE = 81.2,  $z = -$   
372  $0.44$ ,  $p = 1.0$ ; cortisol treated:  $b = -139.6$ , SE = 88.7,  $z = -1.57$ ,  $p = 0.62$ ). Control squirrels had  
373 significantly higher plasma cortisol concentrations in samples taken 30 minutes after ACTH injection  
374 compared to those obtained 60 min after the Dex injection ( $604.9 \pm 93.6$  ng/ml,  $b = 321.1$ , SE = 81.2,  $z =$   
375  $3.97$ ,  $p < 0.001$ ) but not in samples taken 60 min after ACTH injection ( $404.6 \pm 76.3$  ng/ml,  $b = -213.4$ ,  
376 SE = 85.1,  $z = -2.51$ ,  $p = 0.10$ ). In cortisol treated squirrels, plasma cortisol concentrations were  
377 unaffected by ACTH as plasma cortisol concentrations in samples taken 30 minutes after ACTH  
378 injection ( $153.5 \pm 22.1$  ng/ml,  $b = -51.8$ , SE = 88.7,  $z = -0.58$ ,  $p = 1.0$ ) and 60 minutes after ACTH

379 injection ( $163.1 \pm 36.7$  ng/ml,  $b = 9.5$ ,  $SE = 83.5$ ,  $z = 0.11$ ,  $p = 1.0$ ) were no different from those obtained  
380 60 min after the Dex injection.

381 *Responsiveness of HPA axis to Dex/ACTH challenges in squirrels sampled the day after consuming their*  
382 *last treatment*

383 In squirrels sampled the day after consuming their last treatment, HPA axis responsiveness to  
384 our Dex/ACTH challenges differed between control and cortisol treated squirrels ( $F_{4,46.5} = 9.2$ ,  $p <$   
385  $0.001$ , Fig. 3B). Cortisol treated squirrels that were sampled the day after consuming their last treatment  
386 had lower plasma cortisol concentrations than controls at all sampling times (Fig. 3B). Although true  
387 baseline plasma cortisol concentrations did not differ between cortisol treated and control squirrels ( $b =$   
388  $48$ ,  $SE = 82.7$ ,  $z = 0.6$ ,  $p = 0.99$ , Fig. 3B), stress-induced plasma cortisol concentrations ( $35.9 \pm 21.2$   
389 ng/ml) were on average 92.3% lower in cortisol treated squirrels than in control squirrels ( $468.5 \pm 34.8$   
390 ng/ml,  $b = -404.8$ ,  $SE = 67.4$ ,  $z = -6.0$ ,  $p < 0.001$ , Fig. 3B). Plasma cortisol concentrations after the Dex  
391 injection were an average of 76.4% lower in cortisol treated squirrels ( $56.5 \pm 34.6$  ng/ml) than controls  
392 ( $239.8 \pm 24.8$  ng/ml,  $b = -183.3$ ,  $SE = 53.7$ ,  $z = -3.4$ ,  $p = 0.006$ ). Cortisol treated squirrels had plasma  
393 cortisol concentrations (mean =  $97.9 \pm 19.9$  ng/ml) that were on average 80.4% lower than in control  
394 squirrels (mean =  $498.8 \pm 34.6$  ng/ml,  $b = 398.1$ ,  $SE = 57.5$ ,  $z = -6.9$ ,  $p < 0.001$ ) 30 min after the ACTH  
395 injection. This difference remained 60 min after the ACTH injection (cortisol mean =  $101.7 \pm 11.4$  ng/ml,  
396 control mean =  $469.0 \pm 89.2$  ng/ml, a difference of 78.3%,  $b = -368.2$ ,  $SE = 56.8$ ,  $z = -6.5$ ,  $p < 0.001$ , Fig.  
397 3B).

398 In squirrels sampled the day after receiving their last treatment, control squirrels ( $b = -211.9$ ,  
399  $SE = 53.7$ ,  $z = -3.9$ ,  $p < 0.001$ ), but not cortisol treated squirrels ( $b = 9.6$ ,  $SE = 49.4$ ,  $z = 0.2$ ,  $p = 1.0$ ),  
400 had significantly lower plasma cortisol concentrations 60 minutes after Dex injections compared to  
401 stress-induced concentrations. Thirty minutes after the ACTH injection (ACTH30), control squirrels ( $b$

402 = 257.3, SE = 45.6,  $z = 5.6$ ,  $p < 0.001$ ), had significantly higher plasma cortisol concentrations than 60  
403 minutes after Dex injections. In cortisol treated squirrels, plasma cortisol concentrations were higher at  
404 30 minutes after ACTH injection (ACTH30) than 60 minutes after Dex injection, but this was not  
405 significant ( $b = 42.6$ , SE = 44.7,  $z = 0.95$ ,  $p = 0.95$ , Fig. 3B).

#### 406 *Effects of cortisol treatment on plasma CBG and free cortisol concentrations*

407 Squirrels treated with cortisol had significantly lower CBG concentrations in plasma samples  
408 obtained during our Dex/ACTH challenges compared to controls regardless of whether the samples were  
409 obtained on the same day as consuming their last treatments ( $F_{1,5.0} = 51.0$ ,  $p < 0.001$ ) or the day after  
410 consuming their last treatment ( $F_{1,12.9} = 29.3$ ,  $p < 0.001$ , Fig. 6A). Consequently, squirrels treated with  
411 cortisol had significantly higher free cortisol concentrations in plasma samples obtained during the  
412 Dex/ACTH challenges regardless of whether they were sampled on the same day ( $F_{1,5.0} = 7.6$ ,  $p = 0.04$ )  
413 or the day after consuming their last treatments ( $F_{1,12.1} = 15.3$ ,  $p = 0.002$ , Fig. 6B). CBG concentrations  
414 in plasma samples obtained during the Dex/ACTH challenges from squirrels sampled the day after  
415 consuming their last treatment did not vary among the different sample types (stress-induced, Dex,  
416 ACTH30, ACTH60:  $F_{3,6.2} = 1.0$ ,  $p = 0.46$ ), nor did percent free cortisol ( $F_{3,12.3} = 0.5$ ,  $p = 0.71$ ).

417 In plasma samples obtained from squirrels at regular intervals after they entered our live traps,  
418 CBG concentrations were significantly lower in plasma samples acquired from cortisol treated squirrels  
419 compared to controls ( $F_{1,7.0} = 24.5$ ,  $p = 0.002$ , Fig. 6A), but percent free cortisol did not differ between  
420 cortisol treated and control squirrels ( $F_{7.0} = 2.3$ ,  $p = 0.17$ ). The effect of treatment on plasma CBG  
421 concentrations ( $F_{7.0} = 1.3$ ,  $p = 0.30$ ) and percent free cortisol ( $F_{1,7.0} = 1.9$ ,  $p = 0.21$ ) was not different  
422 between squirrels sampled the same day or the day after last treatment.

#### 423 *Effects of treatments on body mass*

424 Both control and cortisol treated females (effect of treatment period,  $b = 11.9$ ,  $SE = 3.7$ ,  $t_{87.4} =$   
425  $3.26$ ,  $p = 0.001$ ) but not males ( $b = 1.33$ ,  $SE = 3.2$ ,  $t_{32.4} = 0.41$ ,  $p = 0.68$ ) were heavier when they were  
426 being treated ( $n = 23$  females,  $n = 11$  males) compared to before they were being treated ( $n = 24$   
427 females,  $n = 17$  males). However, control and cortisol treated females and males did not differ in body  
428 mass while they were being treated, as indicated by the lack of significant interactions between  
429 treatment and treatment period in both females ( $b = -3.83$ ,  $SE = 4.9$ ,  $t_{87.2} = -0.79$ ,  $p = 0.43$ ) and males ( $b$   
430  $= 6.5$ ,  $SE = 4.84$ ,  $t_{29.5} = 1.34$ ,  $p = 0.19$ ). Although females and males in both treatment groups (control or  
431 cortisol) were treated for varying lengths of time, treatment duration did not affect body mass as  
432 indicated by the lack of significant interactions between treatment and treatment duration for both  
433 females ( $b = -1.36$ ,  $SE = 12.1$ ,  $t_{17.8} = -0.11$ ,  $p = 0.91$ ) and males ( $b = 1.73$ ,  $SE = 3.8$ ,  $t_{49.7} = 0.45$ ,  $p =$   
434  $0.65$ ).

#### 435 *Effects of treatments on litter survival*

436 For females that were treated during pregnancy, there was no significant difference in litter  
437 survival rates before the first nest entry between females treated with cortisol (6, 8, 12 mg/day) during  
438 pregnancy (14/47 litters lost) and controls (7/24 litters lost;  $z = 0.28$ ,  $p = 0.78$ ). Similarly, there were also  
439 no significant difference in litter survival between the first and second nest entry for females treated with  
440 cortisol during pregnancy (17/47 litters lost) and controls (4/24 litters lost:  $z = 0.01$ ,  $p = 0.99$ ). Even  
441 though control (range = 11-23 d) and cortisol treated (range = 8-25 d) pregnant females were treated for  
442 different lengths of time, there was no effect of treatment duration for both control and cortisol treated  
443 females on litter survival prior to the first nest entry (treatment x treatment duration,  $z = -0.39$ ,  $p = 0.69$ )  
444 and between the first and second nest entry ( $z = -0.16$ ,  $p = 0.87$ ).

445 For females treated during lactation ( $n = 17$ ), there was no significant difference in litter  
446 survival between the first and second nest entry, with 1/8 control females losing their litter and 3/9

447 cortisol fed (12 mg/day) females losing their litter ( $z = 0.001$ ,  $p = 1$ ). Although treatment duration varied  
448 for control (range = 10-11 d) and cortisol treated (range = 8-10 d) lactating females, there was once  
449 again no effect of treatment duration for both control and cortisol treated females (treatment x treatment  
450 duration,  $z = -0.005$ ,  $p = 0.97$ ).

#### 451 *Effects of treatments and treatment duration on adult survival*

452 There was no difference in survival to one year following cessation of the treatments between  
453 controls (18/25 survived to one year) and those fed cortisol (14/25 survived to one year;  $z = -1.09$ ,  $p =$   
454  $0.27$ ). Although the duration of the cortisol or control treatments slightly varied among cortisol treated  
455 (range = 8-35 d) or control (range = 10-26 d) squirrels, treatment duration did not affect adult survival as  
456 indicated by the lack of significant interaction between treatment and treatment duration ( $z = 0.63$ ,  $p =$   
457  $0.53$ ). There was no difference in survival between males (7/9 survived to one year), and females (25/41  
458 survived to one year,  $z = 1.19$ ,  $p = 0.24$ ).

459

460

## 461 **Discussion**

462 Our results on cortisol manipulations in wild red squirrels, spanning a range of dosages, life  
463 history stages, and including both sexes, provide important information regarding the response of wild  
464 animals to such hormone manipulation including the possible fitness consequences of hormone  
465 manipulation. Squirrels treated with cortisol had higher FGM concentrations and true baseline plasma  
466 cortisol concentrations over a 24 h period. However, similar to studies in humans, laboratory rodents, or  
467 wild birds (see Introduction), our results highlight that exogenous GCs can cause the adrenals to stop  
468 responding to handling stress or pharmaceutical (Dex/ACTH) challenges. Although we documented that

469 treatment with exogenous GCs affected the responsiveness of the HPA axis, these effects were short-  
470 lived and did not affect fitness proxies, including body mass, and offspring or adult survival.

471 Our results indicate that concentrations of CBG were significantly reduced in squirrels treated  
472 with cortisol for one or two weeks, suggesting that chronically elevated GCs reduce CBG  
473 concentrations. This reduction in CBG may result in a higher bioavailability of plasma cortisol (Breuner  
474 et al., 2013). Previous studies in rats have shown that administration of exogenous GCs can inhibit the  
475 rate of CBG production and secretion in the liver (Feldman et al., 1979), and one study found that, 24  
476 hours after acute stress, CBG concentrations were reduced in rats (Fleshner et al., 1995). Chronic  
477 elevations in GCs has also been shown to lead to reduced CBG concentrations in most species studied to  
478 date (Armario et al., 1994; Breuner et al., 2013). A previous study found that CBG concentrations in red  
479 squirrel plasma started to decrease as quickly as four hours after the start of Dex/ACTH challenges,  
480 suggesting that although high concentrations of CBG may buffer squirrels from the effects of high  
481 concentrations of free cortisol caused by acute stressors, these concentrations decline rapidly when the  
482 duration of the stressor is longer than a few hours (Boonstra and McColl, 2000). However, this does not  
483 seem to carry any noticeable cost as there were no changes in body mass or litter and adult survival in  
484 response to our treatments.

485 Previous reviews have emphasized the importance of maintaining hormone concentrations  
486 within a physiological range when performing hormone manipulations (Crossin et al., 2016; Fusani,  
487 2008; Zera, 2007). Studies in mammals have shown that acute experimental challenges can cause  
488 increases in plasma cortisol that are comparable to those achieved by our treatments. For example, in  
489 both laboratory rats and wild animals, physical restraint, open field trials, and maze tests may cause >10  
490 fold increases in plasma GCs (Cockrem, 2013). In our study, the highest recorded true baseline plasma  
491 cortisol concentration in cortisol treated squirrels was approximately seven times higher than the

492 average control true baseline plasma cortisol concentration. This indicates that the increase in plasma  
493 cortisol caused by our 8 mg cortisol/day treatment is within the physiological range for a squirrel.  
494 However, it is possible that the duration of elevated plasma cortisol caused by our treatments is longer  
495 than that caused by a natural ecological factor that elicits an increase in plasma cortisol. Studies in rats  
496 show that plasma GCs increase quickly in response to acute stress, but returns to baseline concentrations  
497 within 2-5 hours after the stressor is removed (Marin et al., 2007; Mizoguchi et al., 2001), but in cortisol  
498 treated squirrels, plasma cortisol remained elevated, compared to control squirrels, for an estimated 17  
499 hours post-treatment (Fig. 2).

500 Our results highlight the importance of regularly provisioning individuals with treatments to  
501 sustain increases in hormone concentrations. Although we found that squirrels fed cortisol had  
502 significantly higher concentrations of plasma cortisol over a 24 hr period than the controls, it was  
503 important to provision individuals with the treatments every 24 hrs. This was because plasma cortisol in  
504 cortisol treated squirrels did decrease to concentrations well below those of control squirrels >20 hrs  
505 after consuming their treatments. When it is feasible, daily supplementation may be effective in  
506 maintaining sustained elevations in hormone concentrations and provide an alternative to other methods  
507 like implants that carry some disadvantages (Sopinka et al., 2015). For example, Torres-Medina et al.  
508 (2018) showed that silastic implants, time release pellets, or osmotic pumps that contain corticosterone  
509 can also suppress the responsiveness of the HPA axis in birds, which could decrease overall exposure to  
510 circulating corticosterone. Our study shows that even regular provisioning of exogenous GCs rather than  
511 implants, such as through food in our study (see also Dantzer et al., 2017) or through other methods  
512 (Vitousek et al. 2018), may also decrease the activity of the HPA axis and cause a reduced ability to  
513 mount an increase in circulating GCs in response to an environmental challenge.

514 Our results also highlight the potentially adverse consequences that may occur when ending  
515 hormone manipulations in wild animals. When sampled less than a day after the end of cortisol  
516 treatment, squirrels did not respond to handling stress or ACTH injection, and appeared to have  
517 impaired adrenal function and lower CBG concentrations. Data collected from cortisol treated squirrels  
518 the day after consuming their last treatment showed that plasma cortisol was very low compared to  
519 control squirrels, suggesting exogenous GCs have been excreted but endogenous GCs were being  
520 produced at a lower rate than in control animals. However, plasma cortisol did increase with handling  
521 stress, suggesting some recovery of adrenal function within 24 hrs of stopping the treatments. Our  
522 results suggest that the adrenal gland may need time to recover from treatment, and endogenous cortisol  
523 production may not return to pre-treatment levels for several days.

524 Hormone manipulations can provide powerful tools to study relationships between hormones  
525 and life history traits, and in recent years methods have been developed to achieve this (Sopinka et al.,  
526 2015). Many studies aim to experimentally elevate GCs to test the “cort-fitness hypothesis”, which  
527 proposes that elevations in baseline GCs decreases survival or reproduction (Bonier et al., 2009), or to  
528 document the effects of elevated GCs on behavior or life history traits (Crossin et al., 2016). We show  
529 that elevation of plasma cortisol concentrations within the physiological range for 1-2 weeks had  
530 profound effects on measures of HPA axis reactivity and CBG concentrations. This is similar to the  
531 results of Torres-Medina et al. (2018) that showed that treatment with corticosterone implants can also  
532 cause reduced corticosterone levels in response to capture and handling. However, our study took the  
533 result from Torres-Medina et al. (2018) one step further as we showed how treatment with exogenous  
534 GCs suppresses CBG concentrations and we also investigated the possibility of fitness consequences of  
535 reduced HPA axis reactivity. Despite these observed shifts in the functionality of the neuroendocrine  
536 stress axis and the sustained elevations in GCs, we found no change in body mass or offspring and adult



537 survival. This indicates that some species can tolerate bouts of increased GCs and rapid reorganization  
538 of the stress axis without negatively impacting survival and reproduction.

539

540

541

542 **References**

- 543 Arabi, Y.M., Aljumah, A., Dabbagh, O., Tamim, H.M., Rishu, A.H., Al-Abdulkareem, A., Al Knawy,  
544 B., Hajeer, A.H., Tamimi, W., Cherfan, A., 2010. Low-dose hydrocortisone in patients with  
545 cirrhosis and septic shock: A randomized controlled trial. *Can. Med. Assoc. J.* 182, 1971–1977.  
546 doi:10.1503/cmaj.090707
- 547 Arlt, W., Allolio, B., 2003. Adrenal insufficiency. *Lancet* 361, 1881–1893. doi:10.1016/S0140-  
548 6736(03)13492-7
- 549 Armario, A., Giralt, M., Martí, O., Gavaldà, A., Hidalgo, J., Hsu, B.R., Kuhn, R.W., 1994. The effect of  
550 acute and chronic ACTH administration on pituitary-adrenal response to acute immobilization  
551 stress. Relationship to changes in corticosteroid-binding globulin. *Endocr. Res.* 20, 139–149.
- 552 Axelrod, L., 1976. Glucocorticoid therapy. *Medicine (Baltimore)*. 55, 39–65.
- 553 Barsano, C.P., Baumann, G., 1989. Simple algebraic and graphic methods for the apportionment of  
554 hormone (and receptor) into bound and free fractions in binding equilibria; or how to calculate  
555 bound and free hormone? *Endocrinology* 124, 1101–1106.
- 556 Bates, D., Maechler, M., Bolker, B., Walker, S., Christensen, R.H., Singmann, H., Dai, B.,  
557 Grothendieck, G., Green, P., 2015. Package “lme4.”
- 558 Bonier, F., Martin, P.R., Moore, I.T., Wingfield, J.C., 2009. Do baseline glucocorticoids predict fitness?  
559 *Trends Ecol. Evol.* 24, 634–642. doi:10.1016/j.tree.2009.04.013
- 560 Boonstra, R., McColl, C.J., 2000. Contrasting stress response of male Arctic ground squirrels and red  
561 squirrels. *J. Exp. Zool. Part A Ecol. Genet. Physiol.* 286, 390–404.

- 562 Borchers, H., 2018. Package “pracma.” doi:<https://cran.r-project.org/package=pracma>
- 563 Boutin, S., Wauters, L.A., McAdam, A.G., Humphries, M.M., Tosi, G., Dhondt, A.A., 2006.  
564 Anticipatory reproduction and population growth in seed predators. *Science* (80-. ). 314, 1928–  
565 1930. doi:10.1126/science.1135520
- 566 Breheny, P., Burchett, W., 2016. Package “visreg.” doi:[https://cran.r-](https://cran.r-project.org/web/packages/visreg/vis)  
567 [project.org/web/packages/visreg/vis](https://cran.r-project.org/web/packages/visreg/vis)
- 568 Breuner, C.W., Delehanty, B., Boonstra, R., 2013. Evaluating stress in natural populations of  
569 vertebrates: total CORT is not good enough. *Funct. Ecol.* 27, 24–36. doi:10.1111/1365-2435.12016
- 570 Breuner, C.W., Patterson, S., Hahn, T., 2008. In search of relationships between the acute  
571 adrenocortical response and fitness. *Gen. Comp. Endocrinol.* 157, 288–95.
- 572 Broide, J., Soferman, R., Kivity, S., Golander, A., Dickstein, G., Spirer, Z., Weisman, Y., 1995. Low-  
573 dose adrenocorticotropin test reveals impaired adrenal function in patients taking inhaled  
574 corticosteroids. *J. Clin. Endocrinol. Metab.* 80, 1243–1246. doi:10.1210/jcem.80.4.7714095
- 575 Casolinia, P., Cigliana, G., Alemaa, G., Ruggieria, V., Angeluccia, L., Catalania, A., 1997. Effect of  
576 increased maternal corticosterone during lactation on hippocampal corticosteroid receptors, stress  
577 response and learning in offspring in the early stages of life. *Neuroscience* 79, 1005–1012.
- 578 Catalani, A., Casolini, P., Ciglianab, G., Scaccianoce, S., Consoli, C., Cincque, C., Zuena, A.,  
579 Angelucci, L., 2002. Maternal corticosterone influences behavior, stress response and  
580 corticosteroid receptors in the female rat. *Pharmacol. Biochem. Behav.* 73, 105–114.
- 581 Cockrem, J.F., 2013. Individual variation in glucocorticoid stress responses in animals. *Gen. Comp.*  
582 *Endocrinol.* 181, 45–58. doi:10.1016/j.ygcen.2012.11.025

- 583 Crossin, G.T., Love, O.P., Cooke, S.J., Williams, T.D., 2016. Glucocorticoid manipulations in free-  
584 living animals: Considerations of dose delivery, life-history context and reproductive state. *Funct.*  
585 *Ecol.* 30, 116–125. doi:10.1111/1365-2435.12482
- 586 Dantzer, B., Goncalves, I.B., Spence-Jones, H.C., Bennett, N.C., Heistermann, M., Ganswindt, A.,  
587 Dubuc, C., Gaynor, D., Manser, M.B., Clutton-Brock, T.H. 2017. The influence of stress hormones  
588 and aggression on cooperative behaviour in subordinate meerkats. *Proc. Roy. Soc. B.* 284,  
589 20171248. doi: 10.1098/rspb.2017.1248
- 590 Dantzer, B., McAdam, A.G., Palme, R., Boutin, S., Boonstra, R., 2011. How does diet affect fecal  
591 steroid hormone metabolite concentrations? An experimental examination in red squirrels. *Gen.*  
592 *Comp. Endocrinol.* 174, 124–131. doi:10.1016/j.ygcen.2011.08.010
- 593 Dantzer, B., Mcadam, A.G., Palme, R., Fletcher, Q.E., Boutin, S., Humphries, M.M., Boonstra, R.,  
594 2010. Fecal cortisol metabolite levels in free-ranging North American red squirrels: Assay  
595 validation and the effects of reproductive condition. *Gen. Comp. Endocrinol.* 167, 279–286.  
596 doi:10.1016/j.ygcen.2010.03.024
- 597 Dantzer, B., Newman, A.E.M., Boonstra, R., Palme, R., Boutin, S., Humphries, M.M., Mcadam, A.G.,  
598 2013. Density triggers maternal hormones that increase adaptive offspring growth in a wild  
599 mammal. *Science* 340, 1215–1217. doi:10.1126/science.1235765
- 600 Dantzer, B., Westrick, S.E., van Kesteren, F., 2016. Relationships between endocrine traits and life  
601 histories in wild animals: insights, problems, and potential pitfalls. *Integr. Comp. Biol.* 56, 185–  
602 197. doi:10.1093/icb/icw051
- 603 De Nardo, D.F., Sinervo, B., 1994. Effects of corticosterone on activity and home-range size of free-

- 604 ranging male lizards. *Horm. Behav.* 28, 53–65. doi:10.1006/hbeh.1994.1005
- 605 Delehanty, B., Hossain, S., Jen, C.C., Crawshaw, G.J., Boonstra, R., 2015. Measurement of free  
606 glucocorticoids: quantifying corticosteroid-binding globulin binding affinity and its variation  
607 within and among mammalian species. *Conserv. Physiol.* 3, 1–13. doi: 10.1093/conphys/cov020
- 608 Ebensperger, L.A., Ramírez-Estrada, J., León, C., Castro, R.A., Tolhuysen, L.O., Sobrero, R., Quirici,  
609 V., Burger, J.M., Soto-Gamboa, M., Hayes, L.D., 2011. Sociality, glucocorticoids and direct fitness  
610 in the communally rearing rodent, *Octodon degus*. *Horm. Behav.* 60, 346–352.  
611 doi:10.1016/j.yhbeh.2011.07.002
- 612 Feiwei, M., James, V.H., Barnett, E., 1969. Effect of potent topical steroids on plasma cortisol levels of  
613 infants and children with eczema. *Lancet* 293, 485–487. doi:10.1016/S0140-6736(69)91588-8
- 614 Feldman, D., Mondon, C., Horner, J., Weiser, J.N., 1979. Glucocorticoid and estrogen regulation of  
615 corticosteroid-binding globulin production by rat liver. *Am. J. Physiol. - Endocrinol. Metab.* 237,  
616 493–499.
- 617 Fleshner, M., Deak, T., Spencer, R.L., Laudenslager, M.L., Watkins, L.R., Maier, S., 1995. A long-term  
618 increase in basal levels of corticosterone and a decrease in corticosteroid-binding globulin after  
619 acute stressor exposure. *Endocrinology* 136, 5336–5342.
- 620 Fusani, L., 2008. Endocrinology in field studies: Problems and solutions for the experimental design.  
621 *Gen. Comp. Endocrinol.* 157, 249–253. doi:10.1016/j.ygcn.2008.04.016
- 622 Hothorn, T., Bretz, F., Westfall, P., Heiberger, R., Schuetzenmeister, A., Scheibe, S., 2017. Package  
623 “multcomp.” doi:<https://cran.r-project.org/package=multcomp>
- 624 Jacobs, S., Pullan, P., Potter, J., Shenfield, G., 1983. Adrenal suppression following extradural

- 625       steroids. *Anaesthesia* 38, 953–956. doi:10.1111/j.1365-2044.1983.tb12025.x
- 626   Karatsoreos, I.N., Bhagat, S.M., Bowles, N.P., Weil, Z.M., Pfaff, D.W., McEwen, B.S., 2010. Endocrine  
627       and physiological changes in response to chronic corticosterone: A potential model of the  
628       metabolic syndrome in mouse. *Endocrinology* 151, 2117–2127. doi:10.1210/en.2009-1436
- 629   Kirwan, J.R., Bijlsma, J.W., Boers, M., Shea, B., 2007. Effects of glucocorticoids on radiological  
630       progression in rheumatoid arthritis (Review). *Cochrane Database Syst. Rev.* 1, 1–86.  
631       doi:10.1002/14651858.CD006356
- 632   Korner-Nievergelt, F., Roth, T., von Felten, S., Guelat, J., Almasi, B., Korner-Nievergelt, P., 2015.  
633       Package “blemecho.” doi:<https://cran.r-project.org/web/packages/blmecho/blmecho/>
- 634   Lussier, A.L., Caruncho, H.J., Kalynchuk, L.E., 2009. Repeated exposure to corticosterone, but not  
635       restraint, decreases the number of reelin-positive cells in the adult rat hippocampus. *Neurosci. Lett.*  
636       460, 170–174. doi:10.1016/j.neulet.2009.05.050
- 637   Marin, M.T., Cruz, F.C., Planeta, C.S., 2007. Chronic restraint or variable stresses differently affect the  
638       behavior, corticosterone secretion and body weight in rats. *Physiol. Behav.* 90, 29–35.  
639       doi:10.1016/j.physbeh.2006.08.021
- 640   Mateo, J., 2008. Inverted-U shape relationship between cortisol and learning in ground squirrels.  
641       *Neurobiol. Learn. Mem.* 89, 582–590.
- 642   McAdam, A.G., Boutin, S., Sykes, A.K., Humphries, M.M., 2007. Life histories of female red squirrels  
643       and their contributions to population growth and lifetime fitness. *Ecoscience* 14, 362–369.  
644       doi:10.2980/1195-6860(2007)14[362:LHOFRS]2.0.CO;2
- 645   Meikle, A.W., Tyler, F.H., 1977. Potency and duration of action of glucocorticoids. *Am. J. Med.* 63,

- 646 200–207. doi:10.1016/0002-9343(77)90233-9
- 647 Mizoguchi, K., Yuzurihara, M., Ishige, A., Sasaki, H., Chui, D., Tabira, T., 2001. Chronic stress  
648 differentially regulates glucocorticoid negative feedback response in rats.  
649 Psychoneuroendocrinology 26, 443–459. doi:10.1016/S0306-4530(01)00004-X
- 650 Morris, H., Jorgensen, J., 1971. Recovery of endogenous pituitary-adrenal function in corticosteroid-  
651 treated children. J. Pediatr. 79, 480–488. doi:10.1016/S0022-3476(71)80163-4
- 652 R Core Team, 2017. R version 3.3.3. doi:<https://www.r-project.org/>
- 653 Sapolsky, R.M., Romero, L.M., Munck, A.U., 2000. How do glucocorticoids influence stress responses?  
654 Integrating permissive, suppressive, stimulatory, and preparative actions. Endocr. Rev. 21, 55–89.  
655 doi:10.1210/edrv.21.1.0389
- 656 Schielzeth, H., 2010. Simple means to improve the interpretability of regression coefficients. Methods  
657 Ecol. Evol. 1, 103–113. doi:10.1111/j.2041-210X.2010.00012.x
- 658 Sopinka, N.M., Patterson, L.D., Redfern, J.C., Pleizier, N.K., Belanger, C.B., Midwood, J.D., Crossin,  
659 G.T., Cooke, S.J., 2015. Manipulating glucocorticoids in wild animals: Basic and applied  
660 perspectives. Conserv. Physiol. 3, 1–16. doi:10.1093/conphys/cov031
- 661 Streck, W., Lockwood, M., 1979. Pituitary adrenal recovery following short-term suppression with  
662 corticosteroids. Am. J. Med. 66, 910–914. doi:10.1016/0002-9343(79)90444-3
- 663 Torres-Medina, F., Cabezas, S., Marchant, T.A., Wikelski, M., Romero, L.M., Hau, M., Carrete, M.,  
664 Tella, J.L., Blas, J. 2018. Corticosterone implants produce stress-hyporesponsive birds. J. Exp.  
665 Biol. *in press* doi: 10.1242/jeb.173864

- 666 Touma, C., Sachser, N., Mostl, E., Palme, R., 2003. Effects of sex and time of day on metabolism and  
667 excretion of corticosterone in urine and feces of mice. *Gen. Comp. Endocrinol.* 130, 267–278.  
668 doi:10.1016/S0016-6480(02)00620-2
- 669 Vitousek, M.N., Taff, C.C., Ardia, D.R., Stedman, J.M., Zimmer, C., Salzman, T.C., Winkler, D.W.  
670 2018. The lingering impact of stress: brief acute glucocorticoid exposure has sustained, dose-  
671 dependent effects on reproduction. *Proc. Roy. Soc. B* 285, 20180722. doi: 10.1098/rspb.2018.0722
- 672 Wingfield, J.C., Maney, D.L., Breuner, C.W., Jacobs, J.D., Lynn, S., Ramenofsky, M., Richardson,  
673 R.D., 1998. Ecological bases of hormone - behavior interactions : The “emergency life history  
674 stage.” *Avian Endocrinol. F. Investig. Methods* 38, 191–206. doi:10.1093/icb/38.1.191
- 675 Zera, A.J., 2007. Endocrine analysis in evolutionary-developmental studies of insect polymorphism:  
676 Hormone manipulation versus direct measurement of hormonal regulators. *Evol. Dev.* 9, 499–513.  
677 doi:10.1111/j.1525-142X.2007.00181.xfun
- 678 Zuur, A.F., Ieno, E.N., Elphick, C.S., 2010. A protocol for data exploration to avoid common statistical  
679 problems. *Methods Ecol. Evol.* 1, 3–14. doi:10.1111/j.2041-210X.2009.00001.x

680

681



682 **Figures**

683 **Fig 1.** FGM concentrations in squirrels treated with control (0 mg/day) or with cortisol (6, 8, or 12  
684 mg/day) treatments. Asterisks (\*) indicate significant differences ( $p < 0.05$ ). Upper and lower hinges  
685 correspond to the first and third quartiles. Upper/lower whiskers extend from the hinge to the  
686 highest/lowest value that is within 1.5x the interquartile range. White diamonds indicate means.

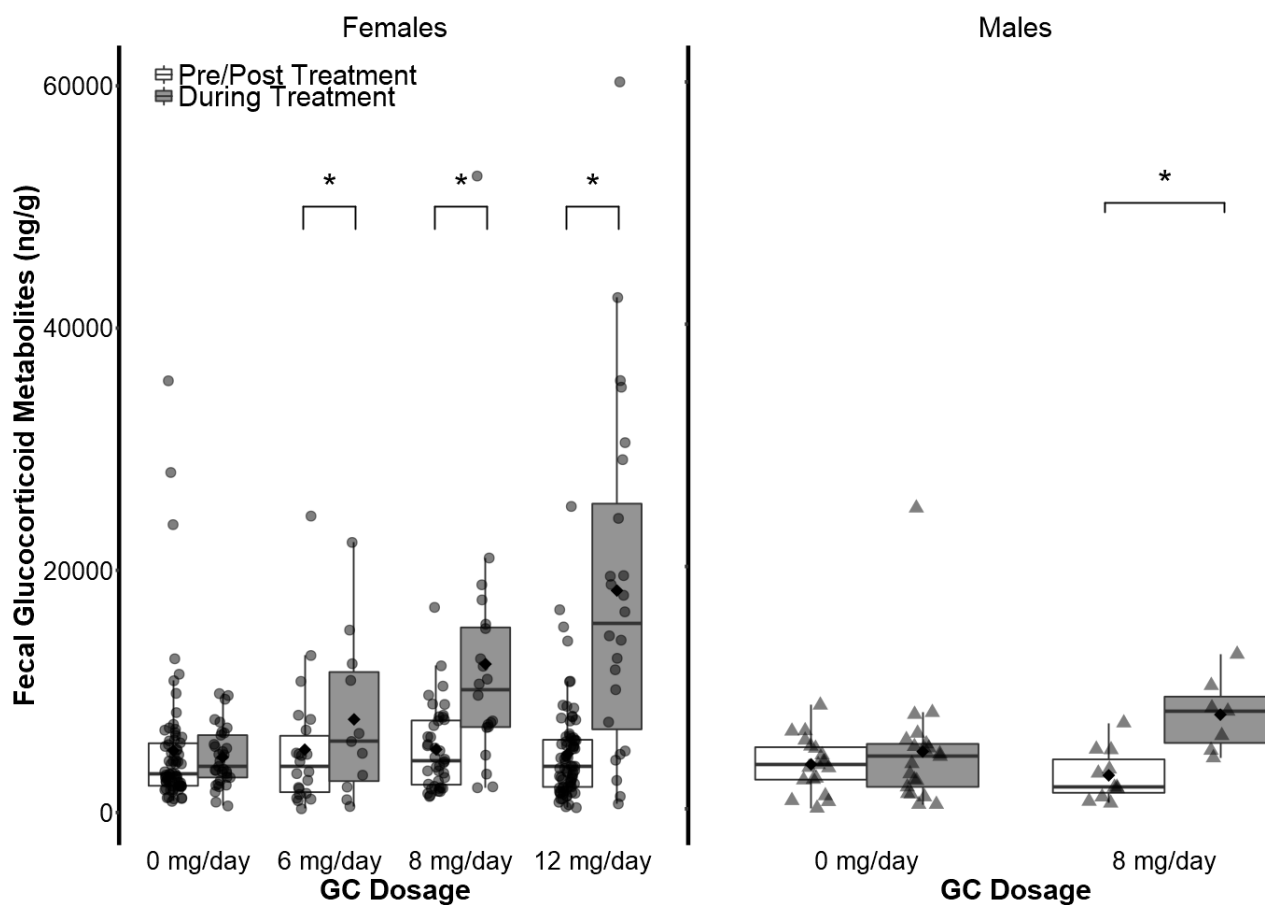

687

688

689

690

691 **Fig. 2.** True baseline plasma cortisol concentrations in squirrels fed cortisol (GC, 8 mg/day) and controls  
692 (0 mg/day) sampled between 1 to 31 hours after confirming they consumed their last treatments.  
693 Different points correspond to different individual squirrels.

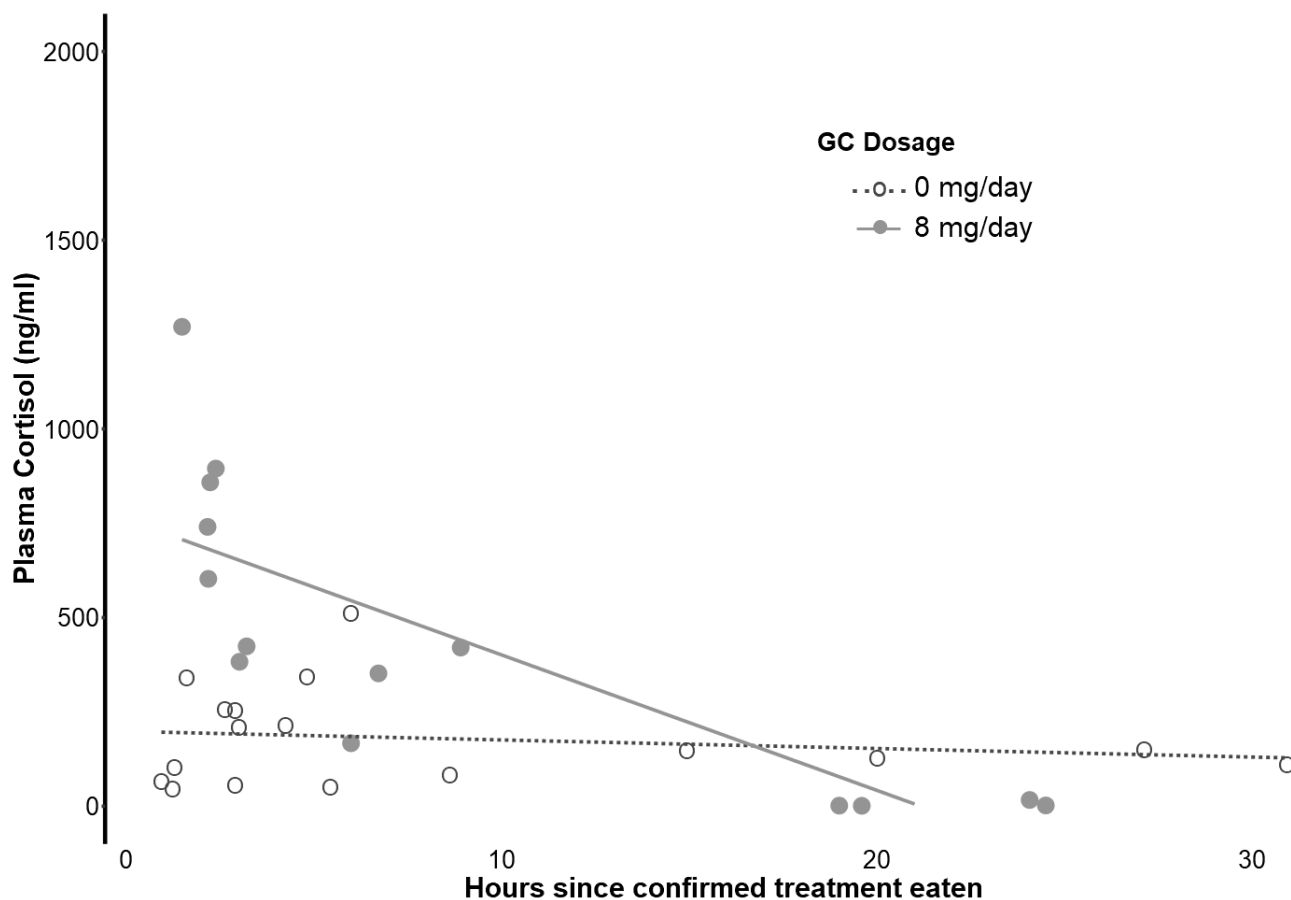

694  
695  
696  
697  
698  
699  
700  
701

702 **Fig. 3.** Effect of time elapsed since squirrels entered traps (“handling stress”) on plasma cortisol  
 703 concentrations from control squirrels (0 mg/day), or those treated with GCs (8 mg/day) and (A) sampled  
 704 the same day as consuming their last treatment or (B) sampled the day after consuming their last  
 705 treatment. Mean and SE are shown.

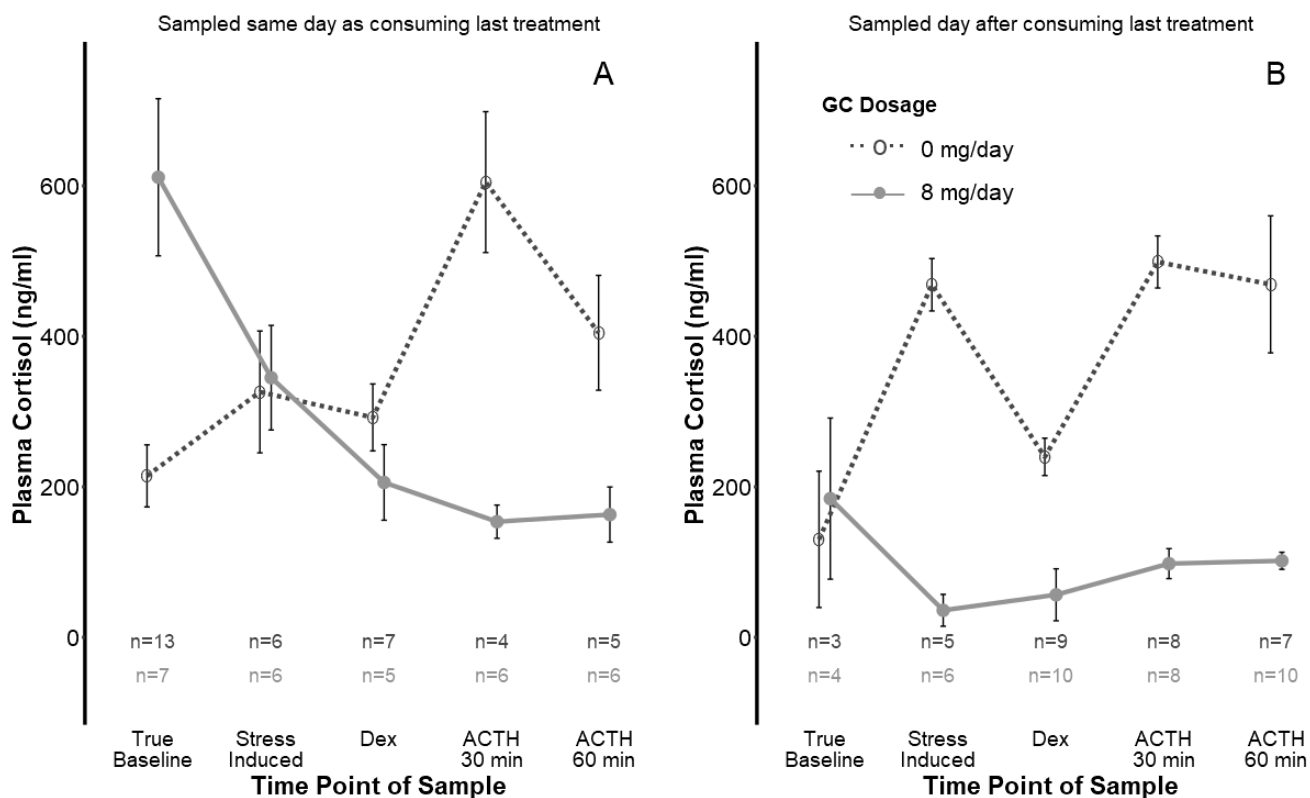

706

707

708

709

710

711

712

713

714 **Fig 4.** Plasma cortisol concentrations following Dex/ACTH challenges conducted on male squirrels  
715 treated with 0 mg (Control) or 8 mg cortisol/day for 7-14 days (GCs). A) Males were trapped the same  
716 day as confirming they consumed their last treatment. B) Males were trapped the day after being fed  
717 their last treatment, but note that the time they consumed their treatments was not recorded. Note that  
718 true baseline samples for cortisol treated squirrels were highly variable (two samples of 321.2 and 412.7  
719 ng/ml, and two of 1.7 ng/ml). Means and standard errors are shown.

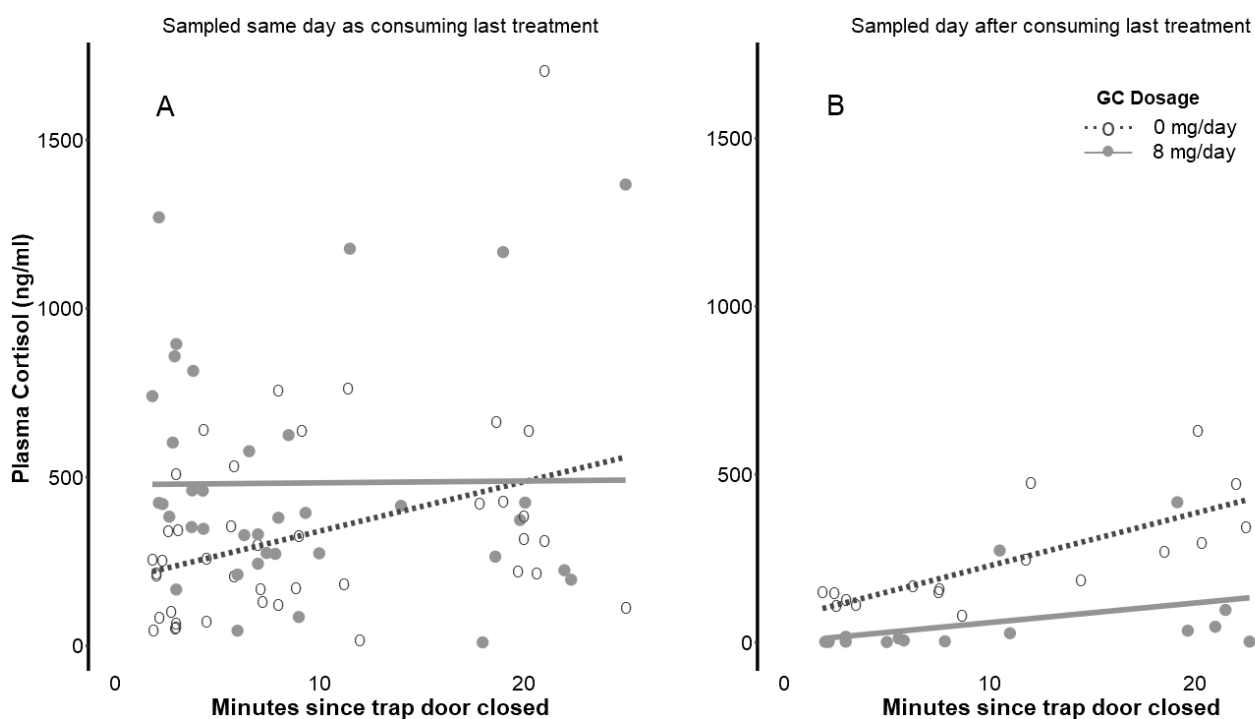

720

721

722

723

724

725

726

727 **Fig. 5.** A) Plasma corticosteroid binding globulin (CBG) and B) percent free cortisol in control and  
728 cortisol treated squirrels subjected to both Dex/ACTH challenges (Dex/ACTH Challenge) and response  
729 to handling stress (blood samples obtained 0-3, 3-6, 6-12 and 18-22 minutes after entering trap were  
730 lumped together). The figure includes squirrels that were sampled both on the same day as consuming  
731 their last treatment and the day after consuming their last treatment. Upper and lower hinges correspond  
732 to the first and third quartiles. Upper/lower whiskers extend from the hinge to the highest/lowest value  
733 that is within 1.5x the interquartile range. White diamonds indicate means.

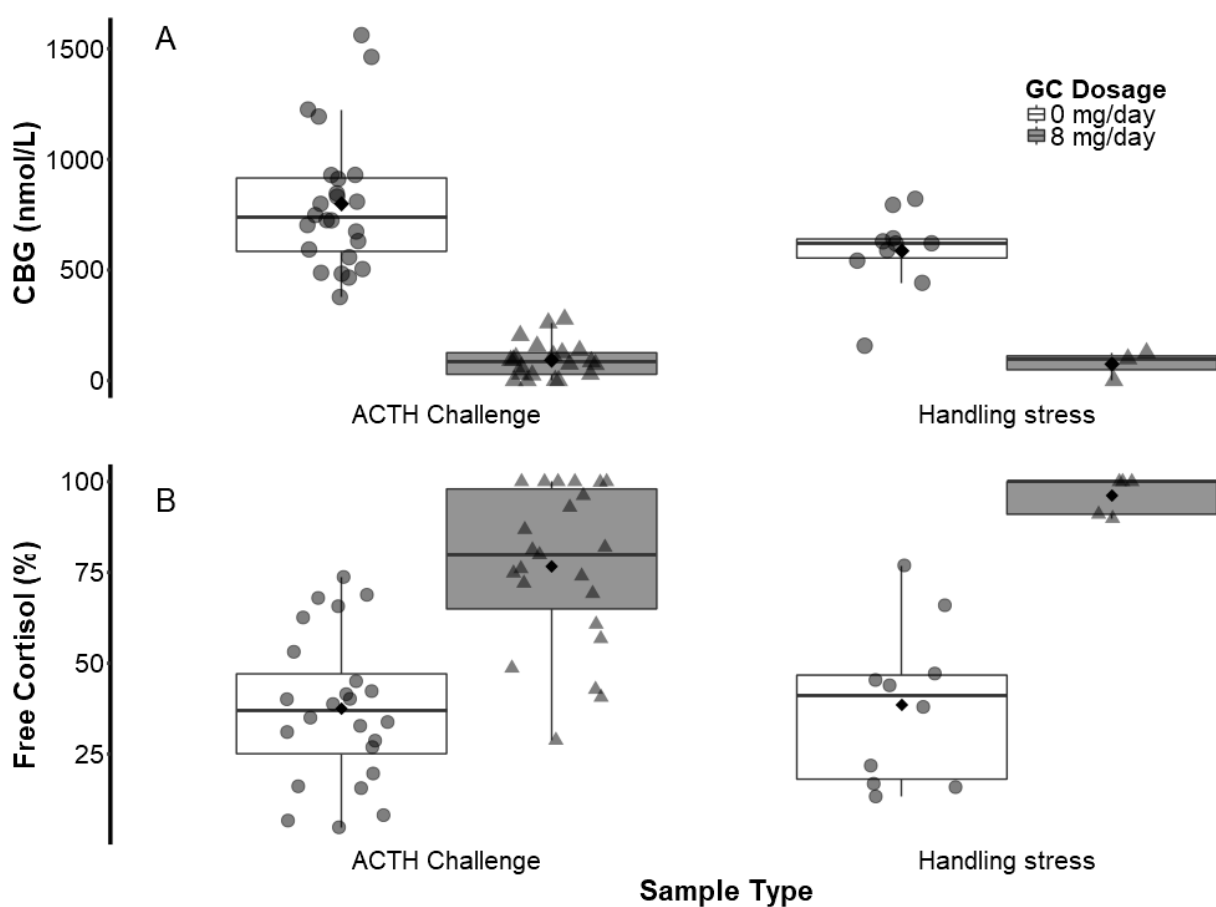

734
